# Supplementary material for: Deteriorated sleep quality and influencing factors among undergraduates in northern Guizhou, China
Source: PeerJ journal article supplement (doi:10.7717/peerj.13833), 2022-08-24
Supplement: Questionaire.pdf [file Questionaire.pdf]

附件一:

编号: \_\_\_\_\_

调查员 \_\_\_\_\_

## 关于我校大学生睡眠状况及影响睡眠因素的调查问卷

亲爱的同学:

您好,这是一份关于大学生睡眠状况及影响睡眠因素的调查问卷,您的回答对我们有很大的帮助,希望占用您几分钟时间,非常感谢您的配合!您的资料仅用于数据分析,将不会用做其他用途!谢谢合作!

性别: 1 男 2 女 年龄: \_\_\_\_\_岁 身高: \_\_\_\_\_cm 体重: \_\_\_\_\_Kg 年级: \_\_\_\_\_级  
专业: \_\_\_\_\_ 类别: 1 二本 2 三本

### 匹兹堡睡眠质量调查问卷 (PSQI 量表)

下面一些问题是关于您最近 1 个月的睡眠情况,请选择或填写最符合您近 1 个月实际情况的答案。请回答下列问题!

- 1.晚上上床睡觉通常 \_\_\_\_\_点钟。
- 2.从上床到入睡通常需要\_\_\_\_\_分钟。
- 3.通常早上\_\_\_\_\_点起床
- 4.每夜通常实际睡眠\_\_\_\_\_小时(不等于卧床时间)。
- 5.您如有因下列情况影响您的睡眠而烦恼,请在相应格子内打勾:

|                  | 无 | <1 次/周 | 1-2 次/周 | ≥ 3 次/周 |
|------------------|---|--------|---------|---------|
| 入睡困难(30 分钟内不能入睡) |   |        |         |         |
| 夜间易醒或早醒          |   |        |         |         |
| 夜间去厕所            |   |        |         |         |
| 呼吸不畅             |   |        |         |         |
| 咳嗽或鼾声高           |   |        |         |         |
| 感觉冷              |   |        |         |         |
| 感觉热              |   |        |         |         |
| 做恶梦              |   |        |         |         |
| 疼痛不适             |   |        |         |         |
| 其它影响睡眠的事情        |   |        |         |         |
| 如有,请说明:          |   |        |         |         |

- 6.总的来说,您认为自己的睡眠质量 a.很好 b.较好 c.较差 d.很差
- 7.您用药物催眠的情况 a.无 b.<1 次/周 c.1-2 次/周 d.≥ 3 次/周
- 8.您常感到困倦吗 a.无 b.<1 次/周 c.1-2 次/周 d.≥ 3 次/周
- 9.您做事情的精力不足吗 a.没有 b.偶尔有 c.有时有 d.经常有

## 影响睡眠的因素（自制）

1. 您是否吸烟            a. 从不            b. 偶尔（每周少于 1 次）            c. 经常
2. 您是否饮酒            a. 从不            b. 偶尔（每月少于 1 次）            c. 经常
3. 您是否睡前喝咖啡    a. 从不            b. 偶尔（每月少于 2 次）            c. 经常
4. 您睡前吃宵夜的情况    a. 从不            b. 每周 1-2 次            c. 每周 3 次以上
5. 您不吃早餐的情况      a. 从不            b. 每周 1-2 次            c. 每周 3 次以上
6. 您认为自己的健康状况    a. 好            b. 一般            c. 差
7. 您使用手机的情况
  - 7.1 平均每天使用手机的时间    a. 1h 以下    b. 1-3h            c. 3-5h 以上    d. 5h 以上
  - 7.2 平均每月使用手机的费用    a. 小于 50 元    b. 大于 50 元
  - 7.3 睡前玩手机多长时间可以入睡？ 约\_\_\_\_\_分钟
8. 您平均每天使用电脑的时间    a. 0-2h/天    b. 2-4h/天            c. 4-6h/天            d. 6h 以上/天
9. 您每天打游戏的情况为    a. 从不            b. 每天 0-2h            c. 每天 2-4h            d. 每天 4h 以上
10. 您参加体育锻炼的频率为    a. 不锻炼            b. 1-2 次/周            c. 3-4 次/周            d. 5 次以上
11. 宿舍环境：
  - 11.1 您认为宿舍舍友睡觉晚吗？    a. 是            b. 否
  - 11.2 您认为宿舍嘈杂吗？            a. 是            b. 否
  - 11.3 您认为宿舍灯光亮吗？            a. 是            b. 否
  - 11.4 您认为宿舍环境卫生怎样？    a. 好            b. 一般            c. 差
12. 您认为与同学关系如何？    a. 相处融洽            b. 相处一般            c. 不好相处
13. 您觉得学习压力如何？        a. 大            b. 一般            c. 小
14. 您决定考研吗？            a. 是            b. 否
15. 您觉得就业压力大吗？        a. 大            b. 一般            c. 小
16. 您认为家庭经济条件如何？    a. 好            b. 一般            c. 差
17. 您需要做兼职或其他途径赚取生活费吗？    a. 是            b. 否
18. 您有谈恋爱吗？    a. 从没有    b. 曾经有    c. 现在有（若选此项做 19 题，否则跳至 20 题）
19. 您认为您与恋人之间的关系如何？    a. 相处融洽            b. 相处一般            c. 不好相处
20. 您认为您目前的状况是否需要心理咨询或心理辅导吗？    a. 是            b. 否
21. 您认为哪些因素促进了您的睡眠\_\_\_\_\_
22. 您认为哪些因素影响了您的睡眠\_\_\_\_\_

调查日期：\_\_\_\_\_年\_\_\_\_\_月\_\_\_\_\_日
